# Supplementary material for: Serum Removal from Culture Induces Growth Arrest, Ploidy Alteration, Decrease in Infectivity and Differential Expression of Crucial Genes in Leishmania infantum Promastigotes
Source: PLoS One. 2016 Mar 9;11(3):e0150172. doi: 10.1371/journal.pone.0150172 (PMC4784933; doi:10.1371/journal.pone.0150172)
Supplement: S1 Table — (XLS) [file pone.0150172.s002.xls]

## Sheet: Hoja1
	S1 Table. Sequences of qRT-PCR primers and probes.
Annotation	Forward (5'-3')	Reverse (5'-3')	FAM-MGB probe (5'-3')
LinJ.05.0060	GAAACTGCTTGACAAGATCGAAGTG	TGCACTGCCTCGCTCTT	CTCCAGCCACTTTGTC
LinJ.09.0960	AATACCTCGCCCACTTCAAC	TCAAACGGATCCAGCACC	ACCACATCCAGGACAAAGATGCCC
LinJ.19.0940	TCCGCTGTTTCACGTCTTC	TCGCCTTGTACTTCTCAATCG	AACTGCATGTTCGCCTACGCC
LinJ.23.0140	AATACCTCGCCCACTTCAAC	TCAAACGGATCCAGCACC	ACCACATCCAGGACAAAGATGCCC
LinJ.23.0150	GCGTGATGCGTGGTATCG	CGGAGACGATGAGACCGTAGATA	ATGGCCGGTATTCTTG
LinJ.24.1240	GGGCTCAACCAGAAGCTTAACTT	CTGATCACAGTCCCGTTGCA	ATCAACCGCGAGTTCC
LinJ.24.1380	TGGAACTTCAGCTTTACGAGG	CGACCTCTTCCCTTTTCAGTG	CACACCTACACTCCCGTGCCTTT
LinJ.26.0030	GCTGGCGAACACAAAGATTG	GCGATATCTGGGACTTCAAGG	AGCGCAACAAGGACGGAGGTATG
LinJ.27.2500	TCGCTAAACTTCAAGACGGG	TCGAACATCACCGTCAGTATG	CGTACTCCGTGCCCAGGATCA
LinJ.29.2560	CATTTTCCTGGTTTACATCCGC	CTCCTTTCTCACTTCTGGCAG	AGCTCCTTCTTCTCATCGCGCTC
